# Supplementary material for: Molecular epidemiology of Marek’s disease virus in central Pennsylvania, USA
Source: PubMed Central journal article supplement (PMC6478013; doi:10.1093/ve/vey042), 2019-04-23
Supplement: vey042_supplementary_data.pdf [file vey042_supplementary_data.pdf]

## Supplementary data.

### Sequence alignments of Pennsylvanian MDV and Rispens vaccine genotypes for the eight markers employed in the study.

MARKER NO. 1: Partial UL49.5 and UL50 genes.

```
Rispens          AGATTTGTCCACGCCACATAATTTACCACTCCTCTTTAAACATATCTGCGGTGAATAGT
PA genotype 1    AGATTTGTCCACGCCACATAATTTACCACTCCTCTTTAAACATATCTGCGGTGAATAGT
PA genotype 2    AGATTTGTCCACGCCACATAATTTACCACTCCTCTTTAAACATATCTGCGGTGAATAGT
*****

Rispens          CGAAAGCATGCGTGATACGAACCCGCTAAGAGGGCGGAGATTACCGCCACCAGACCCAGA
PA genotype 1    CGAAAGCATGCGTGATACGAACCCGCTAAGAGGGCGGAGATTACCGCCACCAGACCCATA
PA genotype 2    CGAAAGCATGCGTGATACGAACCCGCTAAGAGGGCGGAGATTACCGCCACCAGACCCATA
***** *

Rispens          TAAACAGCACAGAAAACCCAGATGAAAAAGCTATTGACACGCCTACTGCAGAACACGTA
PA genotype 1    TAAACAGCACAGAAAACCCAGATGAAAAAGCTATTGACACGCCTACTGCAGAACACGTA
PA genotype 2    TAAACAGCACAGAAAACCCAGATGAAAAAGCTATTGACACGCCTACTGCAGAACACGTA
*****

Rispens          GACTCCCAAAAATCTCCCATACTCGTGATTGAACTTCCCAATCGACAAACGTCGCTTGC
PA genotype 1    GACTCCCAAAAATCTCCCATACTTGTGATTGAACTTCCCAATCGACAAACGTCGCTTGC
PA genotype 2    GACTCCCAAAAATCTCCCATACTTGTGATTGAACTTCCCAATCGACAAACGTCGCTTGC
*****

Rispens          GAAGTGGCAATCAAAATAGCAACGCCGATAACTAAACTACATACTGCATTATGGATGTCC
PA genotype 1    GAAGTGGCAATCAAAATAGCAACGCCGATAACTAAACTACAGACTGCATTATGAATGTCC
PA genotype 2    GAAGTGGCAATCAAAATAGCAACGCCGATAACTAAACTACAGACTGCATTATGAATGTCC
*****

Rispens          ATGAGTCCCATCCTCGTCGAGATCGTGATTTGGAGAATATAACGTTGGAAGCACTAACAG
PA genotype 1    ATGAGTCCCATCCTCGTCGAGATCGTGATTTGGAGAATATAACGTTGGAAGCACTAACAG
PA genotype 2    ATGAGTCCCATCCTCGTCGAGATCGTGATTTGGAGAATATAACGTTGGAAGCACTAACAG
*C*****C*****

Rispens          TTCCCTGGCGTCTGCAATTCCGTGTCGATGAAGCGTTATATGCAGTAAACCCAAACGGTT
PA genotype 1    TTCCCTGGCGTCTGCAATTCCGTGTCGATGAAGCGTTATATGCAGTAAACCCAAACGGTT
PA genotype 2    TTCCCTGGCGTCTGCAATTCCGTGTCGATGAAGCGTTATATGCAGTAAACCCAAACGGTT
*****T*****

Rispens          GGACCTGTTATATAGAAGAGCGTGATCAGCGTTGTCTTCGCGTTACCAACAATTGTGTGA
PA genotype 1    GGACCTGTTATATAGAAGAGCGTGATCAGCGTTGTCTTCGCGTTACCAACAATTGTGTGA
PA genotype 2    GGACCTGTTATATAGAAGAGCGTGATCAGCGTTGTCTTCGCGTTACCAACAATTGTGTGA
*****A*****

Rispens          TCTCGTTACTGAAATCGGATTTAAAGCGCAATATCAAACGTGTACATTGAATATCGGAA
PA genotype 1    TCTCGTTACTGAAATCGGATTTAAAGCGCAGATATCAAACGTGTACATTGAATATCGGAA
PA genotype 2    TCTCGTTACTGAAATCGGATTTAAAGCGCAAATATCAAACGTGTACATTGAATATCGGAA
*****

Rispens          TACGAGTTGCCGTTCCCTCAGAATTACGTGGTCATTTTGGCAAAGTTAACGGATCCAGACC
PA genotype 1    TACGAGTTGCCGTTCCCTCAGAATTACGTGGTCATTTTGGCAAAGTTAACGGATCCAGACC
PA genotype 2    TACGAGTTGCCGTTCCCTCAGAATTACGTGGTCATTTTGGCAAAGTTAACGGATCCAGACC
*****C*****
```

```

Rispens          CAACTTCTCGAGGTATACCCATCATTCAAGTCGCCAATGGATTGATAGATTCAGGATATA
PA genotype 1    CAACTTCTCGAGGTATACCCATCATTCAAGTCGCCAATGGATTGATAGATTCAGGATATA
PA genotype 2    CAACTTCTCGAGGTATACCCATCATTCAAGTCGCCAATGGATTGATAGATTCAGGATATA
                  *****T*****

Rispens          GGGGATCTATCCGAGCAGTATTGTTTTTTGAAAAATCATGTATCATTCACAAAAATGGGC
PA genotype 1    GGGGATCTATCCGAGCAGTATTGTTTTTTGAAAAATCATGTATCATTCACAAAAATGGGC
PA genotype 2    GGGGATCTATCCGAGCAGTATTGTTTTTTGAAAAATCATGTATCATTCACAAAAATGGGC
                  *****

Rispens          TGGCTATTCGTTTATCACTAGTAAAGCTGGCATCTCCCAATTTGA
PA genotype 1    TGGCTATTCGTTTATCACTAGTAAAGCTGGCATCTCCCAATTTGA
PA genotype 2    TGGCTATTCGTTTATCACTAGTAAAGCTGGCATCTCCCAATTTGA
                  *****

```

Nucleotide in blue indicates the single SNP discriminating PA genotypes 1 and 2. Red nucleotides indicate additional previously recorded SNP sites among the ten strains with fully sequenced genomes. Gaps among asterisks indicate SNP differences between PA MDV-1 and Rispens vaccine strain genotypes. Accession numbers: PA1, MK084981; PA2, MK084982.

MARKER NO. 2: partial LORF11 gene.

```

PA genotype 1    GGGTTGCACAATCTTCTCAAAAAAGGTTTGATCAATGCAACTGCACCGCATCTCGACACA
PA genotype 2    GGGTTGCACAATCTTCTCAAAAAAGGTTTGATCAATGCAACTGCACCGCATCTCGACACA
PA genotype 3    GGGTTGCACAATCTTCTCAAAAAAGGTTTGATCAATGCAACTGCACCGCATCTCGACACA
                  *****

PA genotype 1    TGTAACGGGGGCATAGTTGAACGTGCAACAGGTCTTCTGTAAACAAATCTAGACGTATA
PA genotype 2    TGTAACGGGGGCATAGTTGAACGTGCAACAGGTCTTCTGTAAACAAATCTAGACGTATA
PA genotype 3    TGTAACGGGGGCATAGTTGAACGTGCAACAGGTCTTCTGTAAACAAATCTAGACGTATA
                  *****G*****A****

PA genotype 1    CGCCGGGAGCTGCGATACTGTATATTATGTTTCGGCTGTATACGTAGAATGACTACGATGG
PA genotype 2    CGCCGGGAACTGCGATACTGTATATTATGTTTCGGCTGTATACGTAGAATGACTACGATGG
PA genotype 3    CGCCGGGAGCTGCGATACTGTATATTATGTTTCGGCTGTATACGTAGAATGACTACGATGG
                  *****

PA genotype 1    AGCCAATCATCCCATGTGCCAGTAAAGTACATTATAGGTGGAACTTTTTTCTTTGCCCTC
PA genotype 2    AGCCAATCATCCCATGTGCCAGTGAAGTACATTATAGGTGGAACTTTTTTCTTTGCCCTC
PA genotype 3    AGCCAATCATCCCATGTGCCAGTGAAGTACATTATAGGTGGAACTTTTTTCTTTGCCCTC
                  *****

PA genotype 1    ACCTTAGAAGTGATGGTGGTACTATCCCCACTGATGTGTAAATTGAGGGTTTCTTTCCAG
PA genotype 2    ACCTTAGAAGTGATGGTGGTACTATCCCCACTGATGTGTAAATTGAGGGTTTCTTTCCAG
PA genotype 3    ACCTTAGAAGTGATGGTGGTACTATCCCCACTGATGTGTAAATTGAGGGTTTCTTTCCAG
                  *****

PA genotype 1    GGTTTTAGTTTTTCGGATATTAACATATCGTTTGCCCGTCGACAACACTCTTCAACTACC
PA genotype 2    GGTTTTAGTTTTTCGGATATTAACATATCGTTTGCCCGTCGACAACACTCTTCAACTACC
PA genotype 3    GGTTTTAGTTTTTCGGATATTAACATATCGTTTGCCCGTCGACAACACTCTTCAACTACC
                  *****T*****C**

PA genotype 1    CATTTTAAATCGTCTAAGTACACTTCAGATAATTCCTTGACATAGCTTTCATCTGCATCG
PA genotype 2    CATTTTAAATCGTCTAAGTACACTTCAGATAATTCCTTGACATAGCTTTCATCTGCATCG

```

```

PA genotype 3  CATTTTAAATCGTCTAAGTACACTTCAGATAAATTCCTTGACATAGCTTTCATCTGCATCG
*****A
PA genotype 1  CAATCACAACCATTTCGGAAAATAATTGCCCTGATTATTATGTGTAGCTGCGGAACCATCA
PA genotype 2  CAATCACAACCATTTCGGAAAATAATTGCCCTGATTATTATGTGTAGCTGCGGAACCATCA
PA genotype 3  CAATCACAACCATTTCGGAAAATAATTGCCCTGATTATTATGTGTAGCTGCGGAACCATCA
*****T*****
PA genotype 1  AGCTCCATTTTATGATATAAGCGAGATACAGTATCCCTGGTATAACGATAACAGGGGGCA
PA genotype 2  AGCTCCATTTTATGATATAAGCGAGATACAGTATCCCTGGTATAACGATAACAGGGGGCA
PA genotype 3  AGCTCCATTTTATGATATAAGCGAGATACAGTATCCCTGGTATAACGATAACAGGGGGCA
*****
PA genotype 1  ATATCCTTACTAGGGTATAACATGCATTCTGGAGAAACGGACGT
PA genotype 2  ATATCCTTACTAGGGTATAACATGCATTCTGGAGAAACGGACGT
PA genotype 3  ATATCCTTACTAGGGTATAACATGCATTCTGGAGAAACGGACGT
*****

```

Nucleotides in blue indicate the two SNP sites discriminating the three PA genotypes. Red nucleotides indicate additional previously recorded SNP sites among the ten strains with fully sequenced genomes. Rispens vaccine sequence is identical to PA genotype no. 1. Accession numbers: PA1, MK084983; PA2, MK084984; PA3, MK084905.

MARKER NO. 3: Full meq gene.

```

Rispens      ATGTCTCAGGAGCCAGAGCCGGGCGCTATGCCCTACAGTCCCGCTGACGATCCGTCCCC
Rispens-    ATGTCTCAGGAGCCAGAGCCGGGCGCTATGCCCTACAGTCCCGCTGACGATCCGTCCCC
PA genotype 2 ATGTCTCAGGAGCCAGAGCCGGGCGCTATGCCCTACAGTCCCGCTGACGATCCGTCCCC
PA genotype 1 ATGTCTCAGGAGCCAGAGCCGGGCGCTATGCCCTACAGTCCCGCTGACGATCCGTCCCC
PA genotype 4 ATGTCTCAGGAGCCAGAGCCGGGCGCTATGCCCTACAGTCCCGCTGACGATCCGTCCCC
PA genotype 5 ATGTCTCAGGAGCCAGAGCCGGGCGCTATGCCCTACAGTCCCGCTGACGATCCGTCCCC
PA genotype 3 ATGTCTCAGGAGCCAGAGCCGGGCGCTATGCCCTACAGTCCCGCTGACGATCCGTCCCC
*****
Rispens      CTCGATCTTTCTCTCGGGTCGACTTCGAGACGGAAAAAAGGAAAAGTCACGACATCCCC
Rispens-    CTCGATCTTTCTCTCGGGTCGACTTCGAGACGGAAAAAAGGAAAAGTCACGACATCCCC
PA genotype 2 CTCGATCTTTCTCTCGGGTCGACTTCGAGACGGAAAAAAGGAAAAGTCACGACATCCCC
PA genotype 1 CTCGATCTTTCTCTCGGGTCGACTTCGAGACGGAAAAAAGGAAAAGTCACGACATCCCC
PA genotype 4 CTCGATCTTTCTCTCGGGTCGACTTCGAGACGGAAAAAAGGAAAAGTCACGACATCCCC
PA genotype 5 CTCGATCTTTCTCTCGGGTCGACTTCGAGACGGAAAAAAGGAAAAGTCACGACATCCCC
PA genotype 3 CTCGATCTTTCTCTCGGGTCGACTTCGAGACGGAAAAAAGGAAAAGTCACGACATCCCC
*****
Rispens      AACAGCCCCTCCAAACACCCCTTCCCTGACGGCCTATCTGAGGAGGAGAAACAGAAGCTG
Rispens-    AACAGCCCCTCCAAACACCCCTTCCCTGACGGCCTATCTGAGGAGGAGAAACAGAAGCTG
PA genotype 2 AACAGCCCCTCCAAACACCCCTTCCCTGACGGCCTATCTGAGGAGGAGAAACAGAAGCTG
PA genotype 1 AACAGCCCCTCCAAACACCCCTTCCCTGACGGCCTATCTGAGGAGGAGAAACAGAAGCTG
PA genotype 4 AACAGCCCCTCCAAACACCCCTTCCCTGACGGCCTATCTGAGGAGGAGAAACAGAAGCTG
PA genotype 5 AACAGCCCCTCCAAACACCCCTTCCCTGACGGCCTATCTGAGGAGGAGAAACAGAAGCTG
PA genotype 3 AACAGCCCCTCCAAACACCCCTTCCCTGACGGCCTATCTGAGGAGGAGAAACAGAAGCTG
*****
Rispens      GAAAGGAGGAGAAAAAGGAATCGTGACGCCCTCTCGGAGAAGACGCAGGGAGCAGACGGAC
Rispens-    GAAAGGAGGAGAAAAAGGAATCGTGACGCCCTCTCGGAGAAGACGCAGGGAGCAGACGGAC
PA genotype 2 GAAAGGAGGAGAAAAAGGAATCGTGACGCCCTCTCGGAGAAGACGCAGGAGAGCAGACGGAC
PA genotype 1 GAAAGGAGGAGAAAAAGGAATCGTGACGCCCTCTCGGAGAAGACGCAGGAGAGCAGACGGAC
PA genotype 4 GAAAGGAGGAGAAAAAGGAATCGTGACGCCCTCTCGGAGAAGACGCAGGAGAGCAGACGGAC

```

PA genotype 5 GAAAGGAGGAGAAAAAGGAATCGTGACGCCGCTCGGAGAAGACGCAGG**G**AGCAGACG**T**AC  
PA genotype 3 GAAAGGAGGAGAAAAAGGAATCGTGACGCCGCTCGGAGAAGACGCAGG**G**AGCAGACG**T**AC  
\*\*\*\*\*

Rispens TATGTAGACAAACTCCATGAAGCATGTGAAGAGCTGCAGAGGGCCAATGAACACCTACGT  
Rispens- TATGTAGACAAACTCCATGAAGCATGTGAAGAGCTGCAGAGGGCCAATGAACACCTACGT  
PA genotype 2 TATGTAGACAAACTCCATGAAGCATGTGAAGAGCTGCAGAGGGCCAATGAACACCTACGT  
PA genotype 1 TATGTAGACAAACTCCATGAAGCATGTGAAGAGCTGCAGAGGGCCAATGAACACCTACGT  
PA genotype 4 TATGTAGACAAACTCCATGAAGCATGTGAAGAGCTGCAGAGGGCCAATGAACACCTACGT  
PA genotype 5 TATGTAGACAAACTCCATGAAGCATGTGAAGAGCTGCAGAGGGCCAATGAACACCTACGT  
PA genotype 3 TATGTAGACAAACTCCATGAAGCATGTGAAGAGCTGCAGAGGGCCAATGAACACCTACGT  
\*\*\*\*\*

Rispens AAGGAAATTCGAGATCTAAGGACTGAGTGCACGTCCCTGCGTGTACAGTTGGCTTGTCAT  
Rispens- AAGGAAATTCGAGATCTAAGGACTGAGTGCACGTCCCTGCGTGTACAGTTGGCTTGTCAT  
PA genotype 2 AAGGAAATTCGAGATCTAAGGACTGAGTGCACGTCCCTGCGTGTACAGTTGGCT**C**GT**C**AT  
PA genotype 1 AAGGAAATTCGAGATCTAAGGACTGAGTGCACGTCCCTGCGTGTACAGTTGGCT**C**GT**C**AT  
PA genotype 4 AAGGAAATTCGAGATCTAAGGACTGAGTGCACGTCCCTGCGTGTACAGTTGGCT**T**GT**C**AT  
PA genotype 5 AAGGAAATTCGAGATCTAAGGACTGAGTGCACGTCCCTGCGTGTACAGTTGGCT**C**GT**C**AT  
PA genotype 3 AAGGAAATTCGAGATCTAAGGACTGAGTGCACGTCCCTGCGTGTACAGTTGGCT**C**GT**C**AT  
\*\*\*\*\*

Rispens GAGCCAGTTTGCCCTATGGCGGTACCCCTAACGGTGACCCTTGGACTGCTTACCACCCCG  
Rispens- GAGCCAGTTTGCCCTATGGCGGTACCCCTAACGGTGACCCTTGGACTGCTTACCACCCCG  
PA genotype 2 GAGCCAGTTTGCCCTATGGCGGTACCCCTAACGGTGACCCTTGGACTG**C**TTACCACCCCG  
PA genotype 1 GAGCCAGTTTGCCCTATGGCGGTACCCCTAACGGTGACCCTTGGACTG**C**TTACCACCCCG  
PA genotype 4 GAGCCAGTTTGCCCTATGGCGGTACCCCTAACGGTGACCCTTGGACTG**A**TTACCACCCCG  
PA genotype 5 GAGCCAGTTTGCCCTATGGCGGTACCCCTAACGGTGACCCTTGGACTG**C**TTACCACCCCG  
PA genotype 3 GAGCCAGTTTGCCCTATGGCGGTACCCCTAACGGTGACCCTTGGACTG**C**TTACCACCCCG  
\*\*\*\*\*

Rispens CACGATCCCGTTCTTGAACCTCCCATTTGCACTCCTCCACCTCCCTCACC GGATGAACCT  
Rispens- CACGATCCCGTTCTTGAACCTCCCATTTGCACTCCTCCACCTCCCTCACC GGATGAACCT  
PA genotype 2 CACGATCCCGTTCTTGAACCTCCCATTTGCACTCCTC**A**ACCTCCCTCACC GGATGAACCT  
PA genotype 1 CACGATCCCGTTCTTGAACCTCCCATTTGCACTCCTC**A**ACCTCCCTCACC GGATGAACCT  
PA genotype 4 CACGATCCCGTTCTTGAACCTCCCATTTGCACTCCTC**C**ACCTCCCTCACC GGATGAACCT  
PA genotype 5 CACGATCCCGTTCTTGAACCTCCCATTTGCACTCCTC**C**ACCTCCCTCACC GGATGAACCT  
PA genotype 3 CACGATCCCGTTCTTGAACCTCCCATTTGCACTCCTC**C**ACCTCCCTCACC GGATGAACCT  
\*\*\***A**\*\*\*\*\*

Rispens AACGCTCCACATTGCTCCGGTTCCCAACCTCCTATCTGTACCCCCCTCCTCCCGATACG  
Rispens- AACGCTCCACATTGCTCCGGTTCCCAACCTCCTATCTGTACCCCCCTCCTCCCGATACG  
PA genotype 2 AACGCTCCACATTGCTCCGGTTCCCAACCTCCTATCTGTACCCCC**G**CTCCTCCCGAT**A**CG  
PA genotype 1 AACGCTCCACATTGCTCCGGTTCCCAACCTCCTATCTGTACCCCC**G**CTCCTCCCGAT**G**CG  
PA genotype 4 AACGCTCCACATTGCTCCGGTTCCCAACCTCCTATCTGTACCCCC**C**CTCCTCCCGAT**A**CG  
PA genotype 5 AACGCTCCACATTGCTCCGGTTCCCAACCTCCTATCTGTACCCCC**C**CTCCTCCCGAT**A**CG  
PA genotype 3 AACGCTCCACATTGCTCCGGTTCCCAACCTCCTATCTGTACCCCC**C**CTCCTCCCGAT**A**CG  
\*\*\*\*\*

Rispens GAGGAACTTTGCGCCAGCTCTGCTCGACCCCA--CCTCCCATCTCTACTCCCATATT  
Rispens- GAGGAACTTTGCGCCAGCTCTGCTCGACCCCA-----  
PA genotype 2 GAGG**A**GCTTTGCGCCAGCTCTGCTCGACCC**A**CA-----  
PA genotype 1 GAGG**A**GCTTTGCGCCAGCTCTGCTCGACCC**A**CA-----  
PA genotype 4 GAGG**A**ACTTTGCGCCAGCTCTGCTCGACCC**A**CA-----  
PA genotype 5 GAGG**A**ACTTTGCGCCAGCTCTGCTCGACCC**A**CA-----  
PA genotype 3 GAGG**A**ACTTTGCGCCAGCTCTGCTCGACCC**A**TC**A**-----  
\*\*\*\*\*

Rispens ATCTACGCTCCGGGCTTCCCCCTCCAACCTCCTATCTGTACCCCCCTCCTCCCGAT  
Rispens- -----  
PA genotype 2 -----  
PA genotype 1 -----  
PA genotype 4 -----  
PA genotype 5 -----  
PA genotype 3 -----

Rispens GCGGAGGAGCTTTGCGCCCAGCTCTGCTCGACCCACCACCTCCCATCTCTACTCCCCAT  
Rispens-  
PA genotype 2 -----  
PA genotype 1 -----  
PA genotype 4 -----  
PA genotype 5 -----  
PA genotype 3 -----

Rispens ATTTTCTACGCTCCGGGGCTCTGCTCGACCCACCACCTCCCATCTCTACTCCCCATATT  
Rispens- -----CCTCCCATCTCTACTCCCCATATT  
PA genotype 2 -----CCTCCCATCTCTACTCCCCATATT  
PA genotype 1 -----CCTCCCATCTCTACTCCCCATATT  
PA genotype 4 -----CCTCCCATCTCTACTCCCCATATT  
PA genotype 5 -----CCTCCCATCTCTACTCCCCATATT  
PA genotype 3 -----CCTCCCATCTCTACTCCCCATATT  
\*\*\*\*\*

Rispens ATCTACGCTCCGGGGCCTTCCCCCTCCAACCTCCTATCTGTACCCCCCTCCTCCCGAT  
Rispens- ATCTACGCTCCGGGGCCTTCCCCCTCCAACCTCCTATCTGTACCCCCCTCCTCCCGAT  
PA genotype 2 ATCTACGCTCCGGGGCCTTCCCCCTCCAACCTCCTATCTGTACCCCCCTCCTCCCGAT  
PA genotype 1 ATCTACGCTCCGGGGCCTTCCCCCTCCAACCTCCTATCTGTACCCCCCTCCTCCCGAT  
PA genotype 4 ATCTACGCTCCGGGGCCTTCCCCCTCCAACCTCCTATCTGTACCCCCCTCCTCCCGAT  
PA genotype 5 ATCTACGCTCCGGGGCCTTCCCCCTCCAACCTCCTATCTGTACCCCCCTCCTCCCGAT  
PA genotype 3 ATCTACGCTCCGGGGCCTTCCCCCTCCAACCTCCTATCTGTACCCCCCTCCTCCCGAT  
\*\*\*\*\*

Rispens GCGGAGGAGCTTTGCGCCCAGCTCTGCTCGACCCACCACCTCCCATCTGTACTCCCCAT  
Rispens- GCGGAGGAGCTTTGCGCCCAGCTCTGCTCGACCCACCACCTCCCATCTGTACTCCCCAT  
PA genotype 2 GCGGAGGAGCTTTGCGCCCAGCTCTGCTCGACCCACCACCTCCCATCTGTACTCCCCAT  
PA genotype 1 GCGGAGGAGCTTTGCGCCCAGCTCTGCTCGACCCACCACCTCCCATCTGTACTCCCCAT  
PA genotype 4 GCGGAGGAGCTTTGCGCCCAGCTCTGCTCGACCCACCACCTCCCATCTGTACTCCCCAT  
PA genotype 5 GCGGAGGAGCTTTGCGCCCAGCTCTGCTCGACCCACCACCTCCCATCTGTACTCCCCAT  
PA genotype 3 GTGGAGGAGCTTTGCGCCCAGCTCTGCTCGACCCACCACCTCCCATCTGTACTCCCCAT  
\* \*\*\*\*\*

Rispens TCCCTCTTCTGCCCTCCCCAGCTCCATCTCCGGAGGGCATCTTCCCTGCATTGTGTCTT  
Rispens- TCCCTCTTCTGCCCTCCCCAGCTCCATCTCCGGAGGGCATCTTCCCTGCATTGTGTCTT  
PA genotype 2 TCCCTCTTCTGCCCTCCCCAGCTCCATCTCCGGAGGGCATCTTCCCTGCATTGTGTCTT  
PA genotype 1 TCCCTCTTCTGCCCTCCCCAGCTCCATCTCCGGAGGGCATCTTCCCTGCATTGTGTCTT  
PA genotype 4 TCCCTCTTCTGCCCTCCCCAGCTCCATCTCCGGAGGGCATCTTCCCTGCATTGTGTCTT  
PA genotype 5 TCCCTCTTCTGCCCTCCCCAGCTCCATCTCCGGAGGGCATCTTCCCTGCATTGTGTCTT  
PA genotype 3 TCCCTCTTCTGCCCTCCCCAGCTCCATCTCCGGAGGGCATCTTCCCTGCATTGTGTCTT  
\*\*\*\*\*A\*\*\*\*\*

Rispens GTTACCGAGCCGTGTACCCCTCCATCGCCGGGGACGGTTTACGCTCAGCTTTGTCTCTGTT  
Rispens- GTTACCGAGCCGTGTACCCCTCCATCGCCGGGGACGGTTTACGCTCAGCTTTGTCTCTGTT  
PA genotype 2 GTTACCGAGCCGTGTACCCCTCCATCGCCGGGGACGGTTTACGCTCAGCTTTGTCTCTGTT  
PA genotype 1 GTTACCGAGCCGTGTACCCCTCCATCGCCGGGGACGGTTTACGCTCAGCTTTGTCTCTGTT  
PA genotype 4 GTTACCGAGCCGTGTGCCCTCCATCGCCGGGGACGGTTTACGCTCAGCTTTGTCTCTGTT  
PA genotype 5 GTTACCGAGCCGTGTACCCCTCCATCGCCGGGGACGGTTTACGCTCAGCTTTGTCTCTGTT  
PA genotype 3 GTTACCGAGCCGTGTACCCCTCCATCGCCGGGGACGGTTTACGCTCAGCTTTGTCTCTGTT  
\*\*\*\*\*C\*\*\*\*\*

Rispens GGCCAGGCTCCCCTTTTTACCCCATCTCCCCACATCCGGCTCCGGAGCCGGAGAGGCTT  
Rispens- GGCCAGGCTCCCCTTTTTACCCCATCTCCCCACATCCGGCTCCGGAGCCGGAGAGGCTT  
PA genotype 2 GGCCAGGTTCCCCTTTTTACCCCATCTCCCCACATCCGGCTCCGGAGCCGGAGAGGTTT  
PA genotype 1 GGCCAGGCTCCCCTTTTTACCCCATCTCCCCACATCCGGCTCCGGAGCCGGAGAGGCTT  
PA genotype 4 GGCCAGGCTCCCCTTTTTACCCCATCTCCCCACATCCGGCTCCGGAGCCGGAGAGGCTT  
PA genotype 5 GGCCAGGCTCCCCTTTTTACCCCATCTCCCCACATCCGGCTCCGGAGCCGGAGAGGCTT  
PA genotype 3 GGCCAGGCTCCCCTTTTTACCCCATCTCCCCACATCCGGCTCCGGAGCCGGAGAGGCTT  
\*\*\*\*\* \*\*

```

Rispens      TATGCTCGTCTTACCGAGGATCCCGAACAGGATTCCTTGTATTCGGGCCAGATTTATATT
Rispens-    TATGCTCGTCTTACCGAGGATCCCGAACAGGATTCCTTGTATTCGGGCCAGATTTATATT
PA genotype 2 TATGCTCGTCTTACCGAGGATCCCGAACAGGATTCCTTGTATTCGGGCCAGATTTATACT
PA genotype 1 TATGCTCGTCTTACCGAGGATCCCGAACAGGATTCCTTGTATTCGGGCCAGATTTATATT
PA genotype 4 TATGCTCGTCTTACCGAGGATCCCGAACAGGATTCCTTGTATTCGGGCCAGATTTATATT
PA genotype 5 TATGCTCGTCTTACCGAGGATCCCGAACAGGATTCCTTGTATTCGGGCCAGATTTATATT
PA genotype 3 TATGCTCGTCTTACCGAGGATCCCGAACAGGATTCCTTGTATTCGGGCCAGATTTATATT
*****

```

```

Rispens      CAGTTTCCCTCGGATATTCAGTCTACGGTCTGGTGGTTTCCAGGTGACGGGAGACCCTGA
Rispens-    CAGTTTCCCTCGGATATTCAGTCTACGGTCTGGTGGTTTCCAGGTGACGGGAGACCCTGA
PA genotype 2 CAGTTTCCCTCGGATACTCAGTCTACGGTCTGGTGGTTTCCAGGTGACGGGAGACCCTGA
PA genotype 1 CAGTTTCCCTCGGATACTCAGTCTACGGTCTGGTGGTTTCCAGGTGACGGGAGACCCTGA
PA genotype 4 CAGTTTCCCTCGGATACTCAGTCTACGGTCTGGTGGTTTCCAGGTGACGGGAGACCCTGA
PA genotype 5 CAGTTTCCCTCGGATACTCAGTCTACGGTCTGGTGGTTTCCAGGTGACGGGAGACCCTGA
PA genotype 3 CAGTTTCCCTCGGATACTCAGTCTACGGTCTGGTGGTTTCCAGGTGACGGGAGACCCTGA
*****

```

Nucleotides in blue indicate the sixteen SNP sites discriminating the five PA variants. Red nucleotides indicate additional previously recorded SNP sites among the ten strains with fully sequenced genomes. Gaps among asterisks indicate SNP differences between PA variants and Rispens vaccine strain. Accession numbers: PA1, MK040409; PA2, MK040410; PA3, MK040411; PA4, MK040412; PA5, MK040413.

MARKER NO. 3: meq gene deduced amino acid sequence.

```

PA genotype 2 MSQEPEPGAMPYSPADDDPSPLDLSLGSTSRKKRKRKSHDIPNSPSKHPFPDGLSEEEKQKL
PA genotype 4 MSQEPEPGAMPYSPADDDPSPLDLSLGSTSRKKRKRKSHDIPNSPSKHPFPDGLSEEEKQKL
PA genotype 1 MSQEPEPGAMPYSPADDDPSPLDLSLGSTSRKKRKRKSHDIPNSPSKHPFPDGLSEEEKQKL
PA genotype 3 MSQEPEPGAMPYSPADDDPSPLDLSLGSTSRKKRKRKSHDIPNSPSKHPFPDGLSEEEKQKL
PA genotype 5 MSQEPEPGAMPYSPADDDPSPLDLSLGSTSRKKRKRKSHDIPNSPSKHPFPDGLSEEEKQKL
Rispens      MSQEPEPGAMPYSPADDDPSPLDLSLGSTSRKKRKRKSHDIPNSPSKHPFPDGLSEEEKQKL
*****

```

```

PA genotype 2 ERRRKRNRDAARRRRRKQTDYVDKLHEACEELQRANEHLRKEIRDLITECTSLRVQLARH
PA genotype 4 ERRRKRNRDAARRRRRREQTYVVDKLHEACEELQRANEHLRKEIRDLRTESTSLRVQLACH
PA genotype 1 ERRRKRNRDAARRRRRKQTDYVDKLHEACEELQRANEHLRKEIRDLRTESTSLRVQLARH
PA genotype 3 ERRRKRNRDAARRRRRREQTYVVDKLHEACEELQRANEHLRKEIRDLRTESTSLRVQLARH
PA genotype 5 ERRRKRNRDAARRRRRREQTYVVDKLHEACEELQRANEHLRKEIRDLRTESTSLRVQLARH
Rispens      ERRRKRNRDASRRRRRREQTYVDKLHEACEELQRANEHLRKEIRDLRTESTSLRVQLACH
*****S***** ** ***** ** *****A***

```

```

PA genotype 2 EPVCPMAVPLTVTLGLLTTPHDPVPEPPICTPQPPSPDEPNAPHCSGSQPPICTPAPPDT
PA genotype 4 EPVCPMAVPLTVTLGLITTPHDPVPEPPICTPPPPSPDEPNAPHCSGSQPPICTPPPPDT
PA genotype 1 EPVCPMAVPLTVTLGLLTTPHDPVPEPPICTPQPPSPDEPNAPHCSGSQPPICTPAPPDA
PA genotype 3 EPVCPMAVPLTVTLGLLTTPHDPVPEPPICTPPPPSPDEPNAPHCSGSQPPICTPPPPDT
PA genotype 5 EPVCPMAVPLTVTLGLLTTPHDPVPEPPICTPPPPSPDEPNAPHCSGSQPPICTPPPPDT
Rispens      EPVCPMAVPLTVTLGLLTTPHDPVPEPPICTPPPPSPDEPNAPHCSGSQPPICTPPPPDT
*****A**N*****

```

```

PA genotype 2 EELCAQLCSTPP-----
PA genotype 4 EELCAQLCSTPP-----
PA genotype 1 EELCAQLCSTPP-----
PA genotype 3 EELCAQLCSTPS-----
PA genotype 5 EELCAQLCSTPP-----

```

```

Rispens      EELCAQLCSTPPPISTPHIIYAPGPSPLQPPICTPPPPDAEELCAQLCSTPPPISTPHI
*****

PA genotype 2 -----PPISTPHIIYAPGPSPLQPPICTPAPPDAEELCAQLCSTPPPICTPHS
PA genotype 4 -----PPISTPHIIYAPGPSPLQPPICTPAPPDAEELCAQLCSTPPPICTPHS
PA genotype 1 -----PPISTPHIIYAPGPSPLQPPICTPAPPDAEELCAQLCSTPPPICTPHS
PA genotype 3 -----PPISTPHIIYAPGPSPLQPPICTPAPPDAEELCAQLCSTPPPICTPHS
PA genotype 5 -----PPISTPHIIYAPGPSPLQPPICTPAPPDAEELCAQLCSTPPPICTPHS
Rispens      FYAPGLCSTPPPISTPHIIYAPGPSPLQPPICTPPPPDAEELCAQLCSTPPPICTPHS
*****P*****

PA genotype 2 LFCPPQPPSPEGIFPALCPVTEPCTPPSPGTVYAQLCPVGQVPLFTSPPHPAPEPERLY
PA genotype 4 LFCPPQPPSPEGIFPALCPVTEPCAPPSPGTVYAQLCPVGQAPLFTSPPHPAPEPERLY
PA genotype 1 LFCPPQPPSPEGIFPALCPVTEPCTPPSPGTVYAQLCPVGQAPLFTSPPHPAPEPERLY
PA genotype 3 LFCPPQPPSPEGIFPALCPVTEPCTPPSPGTVYAQLCPVGQAPLFTSPPHPTPEPERLY
PA genotype 5 LFCPPQPPSPEGIFPALCPVTEPCTPPSPGTVYAQLCPVGQAPLFTSPPHPAPEPERLY
Rispens      LFCPPQPPSPEGIFPALCPVTEPCTPPSPGTVYAQLCPVGQAPLFTSPPHPAPEPERLY
*****P*****

PA genotype 2 ARLTEDPEQDSLYSQIYTQFPSDTQSTVWWFPGDGRP
PA genotype 4 ARLTEDPEQDSLYSQIYIQFPSDTQSTVWWFPGDGRP
PA genotype 1 ARLTEDPEQDSLYSQIYIQFPSDTQSTVWWFPGDGRP
PA genotype 3 ARLTEDPEQDSLYSQIYIQFPSDTQSTVWWFPGDGRP
PA genotype 5 ARLTEDPEQDSLYSQIYIQFPSDTQSTVWWFPGDGRP
Rispens      ARLTEDPEQDSLYSQIYIQFSDIQSTVWWFPGDGRP
*****

```

Residues in blue indicate the fourteen non-synonymous amino acid mutations discriminating the five PA genotypes. Red nucleotides indicate additional previously recorded residue differences among the ten strains with fully sequenced genomes. Gaps among asterisks indicate residue differences between PA genotypes and Rispens vaccine strain.

#### MARKER NO. 4: proximal region of ICP4 gene.

```

PA genotype 3 AAACCCATTTTCGTGCAGCTCGGTTAGAATATGTCTCGCCGAGAGAAAGTCTGGCCTC
PA genotype 1 AAACCCATTTTCGTGCAGCTCGGTTAGAATATGTCTCGCCGAGAGAAAGTCTGGCCTC
PA genotype 2 AAACCCATTTTCGTGCAGCTCGGTTAGAATATGTCTCGCCGAGAGAAAGTCTGGCCTC
*****

PA genotype 3 ACGTGTTTAACTGCAGCAAAATAAAAGAGGGGAGTAGTAGGAACGCAAGATACGTCTTCC
PA genotype 1 ACGTGTTTAACTGCAGCAAAATAAAAGAGGGGAGTAGTAGGAACGCAAGATACGTCTTCC
PA genotype 2 ACGTGTTTAACTGCAGCAAAATAAAAGAGGGGAGTAGTAGGAACGCAAGATACGTCTTCC
*****T*****

PA genotype 3 AGGCGCGTTTCGACTGTATACCGGACATTGCCGGTACAACATAGATTGATGGTACTGTCC
PA genotype 1 AGGCGCGTTTCGACTGTATACCGGACATTGCCGGTACAACATAGATTGATGGTACTGTCC
PA genotype 2 AGGCGCGTTTCGACTGTATACCGGACATTGCCGGTACAACATAGATTGATGGTACTGTCC
*****

PA genotype 3 TCTATCCCAATTTCACAGTAATAATACTGTTCTAGATCCATGAGAGTTAATGGGCCGACA
PA genotype 1 TCTATCCCAATTTCACAGTAATAATACTGTTCTAGATCCATGAGAGTTAATGGGCCGACA
PA genotype 2 TCTATCCCAATTTCACAGTAATAATACTGTTCTAGATCCATGAGAGTTAATGGGCCGACA
****C**** *****G*****

```

PA genotype 3 ACATCCCGCAGGTTATAATAGTGGTCCCGAAATCGAGAAGGCC**CGGCCAGCGGACACAG**  
PA genotype 1 ACATCCCGCAGGTTATAATAGTGGTCCCGAAATCGAGAAGGCC**GGGCCAGCGGACACAG**  
PA genotype 2 ACATCCCGCAGGTTATAATAGTGGTCCCGAAATCGAGAAGGCC**GGGCCAGCGGACACAG**  
\*\*\*\*\*S\*\*\*\*\*T\*\*\*\*\*

PA genotype 3 CACTGACTACGGGTGAAATTATACATTTTCATGTAACGTGTCGCTTCTTCAATGATACAT  
PA genotype 1 CACTGACTACGGGTGAAATTATACATTTTCATGTAACGTGTCGCTTCTTCAATGATACAT  
PA genotype 2 CACTGACTACGGGTGAAATTATACATTTTCATGTAACGTGTCGCTTCTTCAATGATACAT  
\*\*\*\*\*

PA genotype 3 GGACCGTTTT**GT**AGTCTATATCGATCTTCTACCGTATCCATGATTATAAGTTCTTTTTTA  
PA genotype 1 GGACCGTTTT**GGC**AGTCTATATCGATCTTCTACCGTATCCATGATTATAAGTTCTTTTTTA  
PA genotype 2 GGACCGTTTT**GGT**AGTCTATATCGATCTTCTACCGTATCCATGATTATAAGTTCTTTTTTA  
\*\*\*\*\* \* \*\*\*\*\*

PA genotype 3 CGTTTCATACATTGACGTTGTAGGTATTCCACAGCACCCGTATAGCCCAAATCCTCTGTT  
PA genotype 1 CGTTTCATACATTGACGTTGTAGGTATTCCACAGCACCCGTATAGCCCAAATCCTCTGTT  
PA genotype 2 CGTTTCATACATTGACGTTGTAGGTATTCCACAGCACCCGTATAGCCCAAATCCTCTGTT  
\*\*\*\*\*

PA genotype 3 GATAAAAACAGGACTCCCATCCGAGTCAGTGGAGATATATCGGGTGCTGCTTTCATCGG  
PA genotype 1 GATAAAAACAGGACTCCCATCCGAGTCAGTGGAGATATATCGGGTGCTGCTTTCATCGG  
PA genotype 2 GATAAAAACAGGACTCCCATCCGAGTCAGTGGAGATATATCGGGTGCTGCTTTCATCGG  
\*\*\*\*\*

PA genotype 3 CCAGCCCACGCACTGCTCTTGGGTAAGCATAATCGGTTAGAAAATGCAGCAAGGAGGAAT  
PA genotype 1 CCAGCCCACGCACTGCTCTTGGGTAAGCATAATCGGTTAGAAAATGCAGCAAGGAGGAAT  
PA genotype 2 CCAGCCCACGCACTGCTCTTGGGTAAGCATAATCGGTTAGAAAATGCAGCAAGGAGGAAT  
\*\*\*\*\*C\*\*\*\*\*

PA genotype 3 GATAATCCTCCTCGCTTATTATCAAACCTTCAGCCCTCCCGGGGAGTATCTGGAGCGGGT  
PA genotype 1 GATAATCCTCCTCGCTTATTATCAAACCTTCAGCCCTCCCGGGGAGTATCTGGAGCGGGT  
PA genotype 2 GATAATCCTCCTCGCTTATTATCAAACCTTCAGCCCTCCCGGGGAGTATCTGGAGCGGGT  
\*\*\*\*\*C\*\*\*\*\*

PA genotype 3 ACGCAAAACAGGTGTTTCGCCCTGGGAGGGGTGAGTATAAAACAACGATAGACACATCATCG  
PA genotype 1 ACGCAAAACAGGTGTTTCGCCCTGGGAGGGGTGAGTATAAAACAACGATAGACACATCATCG  
PA genotype 2 ACGCAAAACAGGTGTTTCGCCCTGGGAGGGGTGAGTATAAAACAACGATAGACACATCATCG  
\*\*\*\*\*

PA genotype 3 GGAGATTCTTGTGGTATCGCATCCAAGCAGTCCTTGCTCTAAGCTTTGAAGTGGCTGTG  
PA genotype 1 GGAGATTCTTGTGGTATCGCATCCAAGCAGTCCTTGCTCTAAGCTTTGAAGTGGCTGTG  
PA genotype 2 GGAGATTCTTGTGGTATCGCATCCAAGCAGTCCTTGCTCTAAGCTTTGAAGTGGCTGTG  
\*\*\*\*\*A\*\*\*\*\*

PA genotype 3 TGAAATGCCCTCAGATGCAGCGCTAGTTATAATTTTCGTTACTATTATATTTTCCAGGTAAC  
PA genotype 1 TGAAATGCCCTCAGATGCAGCGCTAGTTATAATTTTCGTTACTATTATATTTTCCAGGTAAC  
PA genotype 2 TGAAATGCCCTCAGATGCAGCGCTAGTTATAATTTTCGTTACTATTATATTTTCCAGGTAAC  
\*\*\*\*\*

PA genotype 3 GCATTTGCG  
PA genotype 1 GCATTTGCG  
PA genotype 2 GCATTTGCG  
\*\*\*\*\*

Nucleotides in blue indicate the four SNP sites discriminating the three PA genotypes. Red nucleotides indicate additional previously recorded SNP sites among the ten strains with fully sequenced genomes. Rispens vaccine sequence is identical to PA genotype no.

2. Accession numbers: PA1, MK084986; PA2, MK084987; PA3, MK084908.

MARKER NO. 5: distal region of ICP4 gene.

PA genotype 5 GAGGAGGATGTCACCCTGAATATCATTGCGTTGGACGGCTCGGCCGGACTTGGGAGGACG  
PA genotype 2 GAGGAGGATGTCACCCTGAATATCATTGCGTTGGACGGCTCGGCCGGACTTGGGAGGACG  
PA genotype 1 GAGGAGGATGTCACCCTGAATATCATTGCGTTGGACGGCTCGGCCGGACTTGGGAGGACG  
PA genotype 6 GAGGAGGATGTCACCCTGAATATCATTGCGTTGGACGGCTCGGCCGGACTTGGGAGGACG  
PA genotype 4 GAGGAGGATGTCACCCTGAATATCATTGCGTTGGACGGCTCGGCCGGACTTGGGAGGACG  
PA genotype 3 GAGGAGGATGTCACCCTGAATATCATTGCGTTGGACGGCTCGGCCGGACTTGGGAGGACG  
\*\*\*\*\*

PA genotype 5 CCCACGTGGGCGTCTCC**T**CCACGCCTGTTTGCGGTTTCTTGGGGTAAGTAGTCCTCATC  
PA genotype 2 CCCACGTGGGCGTCTCC**C**CCACGCCTGTTTGCGGTTTCTTGGGGTAAGTAGTCCTCATC  
PA genotype 1 CCCACGTGGGCGTCTCC**C**CCACGCCTGTTTGCGGTTTCTTGGGGTAAGTAGTCCTCATC  
PA genotype 6 CCCACGTGGGCGTCTCC**T**CCACGCCTGTTTGCGGTTTCTTGGGGTAAGTAGTCCTCATC  
PA genotype 4 CCCACGTGGGCGTCTCC**T**CCACGCCTGTTTGCGGTTTCTTGGGGTAAGTAGTCCTCATC  
PA genotype 3 CCCACGTGGGCGTCTCC**C**CCACGCCTGTTTGCGGTTTCTTGGGGTAAGTAGTCCTCATC  
\*\*\*\*\***T**\*\*\* \*\*\*\*\*

PA genotype 5 TTCCAGTTTACGCGTTCGGGGCGATG**T**TTTTCTCCCCTTAGACTGCGGTCCGGATCGCCC  
PA genotype 2 TTCCAGTTTACGCGTTCGGGGCGATG**T**TTTTCTCCCCTTAGACTGCGGTCCGGATCGCCC  
PA genotype 1 TTCCAGTTTACGCGTTCGGGGCGATG**C**TTTTCTCCCCTTAGACTGCGGTCCGGATCGCCC  
PA genotype 6 TTCCAGTTTACGCGTTCGGGGCGATG**T**TTTTCTCCCCTTAGACTGCGGTCCGGATCGCCC  
PA genotype 4 TTCCAGTTTACGCGTTCGGGGCGATG**T**TTTTCTCCCCTTAGACTGCGGTCCGGATCGCCC  
PA genotype 3 TTCCAGTTTACGCGTTCGGGGCGATG**T**TTTTCTCCCCTTAGACTGCGGTCCGGATCGCCC  
\*\*\*\*\***G**\*\*\*\*\* \*\*\*\*\*

PA genotype 5 ACCACGATTACTACCTCTGCCCGACGCGGGCGGCTCGAA**C**AATCAGCCCGCGG**T**CTGGG  
PA genotype 2 ACCACGATTACTACCTCTGCCCGACGCGGGCGGCTCGAA**C**AATCAGCCCGCGG**C**CTGGG  
PA genotype 1 ACCACGATTACTACCTCTGCCCGACGCGGGCGGCTCGAA**G**AATCAGCCCGCGG**T**CTGGG  
PA genotype 6 ACCACGATTACTACCTCTGCCCGACGCGGGCGGCTCGAA**C**AATCAGCCCGCGG**T**CTGGG  
PA genotype 4 ACCACGATTACTACCTCTGCCCGACGCGGGCGGCTCGAA**G**AATCAGCCCGCGG**T**CTGGG  
PA genotype 3 ACCACGATTACTACCTCTGCCCGACGCGGGCGGCTCGAA**C**AATCAGCCCGCGG**T**CTGGG  
\*\*\*\*\* \*\*\*\*\* \*\*\*\*\*

PA genotype 5 GGGCGACGGAGATGGTGACCTAGATGATGAAGGTGAAGAC**G**GGACGATTAGAGAAGATGA  
PA genotype 2 GGGCGACGGAGATGGTGACCTAGATGATGAAGGTGAAGAC**C**GGACGATTAGAGAAGATGA  
PA genotype 1 GGGCGACGGAGATGGTGACCTAGATGATGAAGGTGAAGAC**G**GGACGATTAGAGAAGATGA  
PA genotype 6 GGGCGACGGAGATGGTGACCTAGATGATGAAGGTGAAGAC**A**GGACGATTAGAGAAGATGA  
PA genotype 4 GGGCGACGGAGATGGTGACCTAGATGATGAAGGTGAAGAC**C**GGACGATTAGAGAAGATGA  
PA genotype 3 GGGCGACGGAGATGGTGACCTAGATGATGAAGGTGAAGAC**G**GGACGATTAGAGAAGATGA  
\*\*\*\*\***G**\***G**\* \*\*\*\*\*

PA genotype 5 TGACGGTGAGGATGATGAAGAGGAGGAAGATGAAGAGGATGGCGATCTGGAACATGTCC  
PA genotype 2 TGACGGTGAGGATGATGAAGAGGAGGAAGATGAAGAGGATGGCGATCTGGAACATGTCC  
PA genotype 1 TGACGGTGAGGATGATGAAGAGGAGGAAGATGAAGAGGATGGCGATCTGGAACATGTCC  
PA genotype 6 TGACGGTGAGGATGATGAAGAGGAGGAAGATGAAGAGGATGGCGATCTGGAACATGTCC  
PA genotype 4 TGACGGTGAGGATGATGAAGAGGAGGAAGATGAAGAGGATGGCGATCTGGAACATGTCC  
PA genotype 3 TGACGGTGAGGATGATGAAGAGGAGGAAGATGAAGAGGATGGCGATCTGGAACATGTCC  
\*\*\*\*\*

PA genotype 5 GACGTTCCGGTGAGTAGTATTGGATGGGGGATTCGGGGAGGGGATATAATAATGTGCTC  
PA genotype 2 GACGTTCCGGTGAGTAGTATTGGATGGGGGATTCGGGGAGGGGATATAATAATGTGCTC  
PA genotype 1 GACGTTCCGGTGAGTAGTATTGGATGGGGGATTCGGGGAGGGGATATAATAATGTGCTC  
PA genotype 6 GACGTTCCGGTGAGTAGTATTGGATGGGGGATTCGGGGAGGGGATATAATAATGTGCTC  
PA genotype 4 GACGTTCCGGTGAGTAGTATTGGATGGGGGATTCGGGGAGGGGATATAATAATGTGCTC  
PA genotype 3 GACGTTCCGGTGAGTAGTATTGGATGGGGGATTCGGGGAGGGGATATAATAATGTGCTC  
**A**\*\*\*\*\*

PA genotype 5 ATTTGACGGTGAAGTCTCAGGGCCGCTGGTCTGGGGAACTTCGTGGAGATGAGGTTGTG  
PA genotype 2 ATTTGACGGTGAAGTCTCAGGGCCGCTGGTCTGGGGAACTTCGTGGAGATGAGGTTGTG  
PA genotype 1 ATTTGACGGTGAAGTCTCAGGGCCGCTGGTCTGGGGAACTTCGTGGAGATGAGGTTGTG  
PA genotype 6 ATTTGACGGTGAAGTCTCAGGGCCGCTGGTCTGGGGAACTTCGTGGAGATGAGGTTGTG  
PA genotype 4 ATTTGACGGTGAAGTCTCAGGGCCGCTGGTCTGGGGAACTTCGTGGAGATGAGGTTGTG

PA genotype 3 ATTTGACGGTGAAGTCTCAGGGCCGCGTGGTCTGGGGAAC<sup>T</sup>TCGTGGAGATGAGGTTGTG  
 \*\*\*\*\*

PA genotype 5 TG  
 PA genotype 2 TG  
 PA genotype 1 TG  
 PA genotype 6 TG  
 PA genotype 4 TG  
 PA genotype 3 TG  
 \*\*

Nucleotides in blue indicate the five SNP sites discriminating the six PA genotypes. Red nucleotides indicate additional previously recorded SNP sites among the ten strains with fully sequenced genomes. Rispens vaccine sequence is identical to PA genotype no. 6. Accession numbers: PA1, MK084989; PA2, MK084990; PA3, MK084991; PA4, MK084992; PA5, MK084993; PA6, MK084994.

MARKER NO. 6: region of pp38 gene.

PA genotype 2 CGAAGCAGAACACGAAGGGCTGACGGCGTCTTGGGTCGCCCCGCTCCCCAGGGTGGAAA  
 Rispens CGAAGCAGAACACGAAGGGCTGACGGCGTCTTGGGTCGCCCCGCTCCCCAGGGTGGAAA  
 PA genotype 1 CGAAGCAGAACACGAAGGGCTGACGGCGTCTTGGGTCGCCCCGCTCCCCAGGGTGGAAA  
 \*\*\*\*\*

PA genotype 2 AGGGGCGGAGGGCCGCGCAGGGGTCGCCGACGAGGCAGGGCATGGGAAAACAGAAGCGGA  
 Rispens AGGGGCGGAGGGCCGCGCAGGGGTCGCCGACGAGGCAGGGCATGGGAAAACAGAAGCGGA  
 PA genotype 1 AGGGGCGGAGGGCCGCGCAGGGGTCGCCGACGAGGCAGGGCATGGGAAAACAGAAGCGGA  
 \*\*\*\*\*

PA genotype 2 ATGCGCCGAGGACGGCGAGAAATGCGGGGACGCCGAGATGAGCGCTTTGGATCGGGTCCA  
 Rispens ATGCGCCGAGGACGGCGAGAAATGCGGGGACGCCGAGATGAGCGCTTTGGATCGGGTCCA  
 PA genotype 1 ATGCGCCGAGGACGGCGAGAAATGCGGGGACGCCGAGATGAGCGCTTTGGATCGGGTCCA  
 \*\*\*\*\*

PA genotype 2 GAGGGACCGGTGGAGATTCAGTTCTCCGCCCCCTCACTCTGGAGTCACGGGGAAGGGGGC  
 Rispens GAGGGACCGGTGGAGATTCAGTTCTCCGCCCCCTCACTCTGGAGTCACGGGGAAGGGGGC  
 PA genotype 1 GAGGGACCGGTGGAGATTCAGTTCTCCGCCCCCTCACTCTGGAGTCACGGGGAAGGGGGC  
 \*\*\*\*\*

PA genotype 2 TATTCCAATAAAGGGTGATGGGAAGGCGATAGAATGCCAGGAGCTAACCGGAGAGGGAGA  
 Rispens TATTCCAATAAAGGGTGATGGGAAGGCGATAGAATGCCAGGAGCTAACCGGAGAGGGAGA  
 PA genotype 1 TATTCCAATAAAGGGTGATGGGAAGGCGATAGAATGCCAGGAGCTAACCGGAGAGGGAGA  
 \*\*\*\*\*

PA genotype 2 GTGGCTGTACAGTGGGAGGAGCTACCGCCTGAGCCCCGAGGTCAGGGAATGAACATCT  
 Rispens GTGGCTGTACAGTGGGGGAGCTACCGCCTGAGCCCCGAGGTCAGGGAATGAACATCT  
 PA genotype 1 GTGGCTGTACAGTGGGGGAGCTACCGCCTGAGCCCCGAGGTCAGGGAATGAACATCT  
 \*\*\*\*\*

PA genotype 2 TGACGAAAGTCGGTATGCGAAACAAACCGAAAGGGGTAGCTCTACGGGGAAGAAGAGGG  
 Rispens TGACGAAAGTCGGTATGCGAAACAAACCGAAAGGGGTAGCTCTACGGGGAAGAAGAGGG  
 PA genotype 1 TGACGAAAGTCGGTATGCGAAACAAACCGAAAGGGGTAGCTCTACGGGGAAGAAGAGGG  
 \*\*\*\*\*

```

PA genotype 2 AGATGGTATGAAGCAGATGGGGGAGCTTGCCAGCAGTGCAGGAGGAACATATGCGGA
Rispens      AGATGGTATGAAGCAGATGGGGGAGCTTGCCAGCAGTGCAGGAGGAACATATGCGGA
PA genotype 1 AGATGGTATGAAGCAGATGGGGGAGCTTGCCAGCAGTGCAGGAGGAACATATGCGGA
*****

PA genotype 2 CTTGCTTGTGCGAAGCAGAGCAAGCTGTTGTACATTCCGTTTCGCGCATTAATGCTGGCCGA
Rispens      CTTGCTTGTGCGAAGCAGAGCAAGCTGTTGTACATTCCGTTTCGCGCATTAATGCTGGCCGA
PA genotype 1 CTTGCTTGTGCGAAGCAGAGCAAGCTGTTGTACATTCCGTTTCGCGCATTAATGCTGGCCGA
*****

PA genotype 2 AAGACAAAACCCAAATATATTGGGGGAGCATTGAATAAAAAACGGGTTCTTGTACAACG
Rispens      AAGACAAAACCCAAATATATTGGGGGAGCATTGAATAAAAAACGGGTTCTTGTACAACG
PA genotype 1 AAGACAAAACCCAAATATATTGGGGGAGCATTGAATAAAAAACGGGTTCTTGTACAACG
*****

PA genotype 2 ACCCCGTACTATTCTATCCGTGGAGTCAGAGAATGCAACAATGCGTTCCTTATATGCTGGT
Rispens      ACCCCGTACTATTCTATCCGTGGAGTCAGAGAATGCAACAATGCGTTCCTTATATGCTGGT
PA genotype 1 ACCCCGTACTATTCTATCCGTGGAGTCAGAGAATGCAACAATGCGTTCCTTATATGCTGGT
*****

PA genotype 2 TACATTGATCTGTTCTGCAAAATCATTATTACTAGGATCGTGCATGTCATTTTTCGCTGG
Rispens      TACATTGATCTGTTCTGCAAAATCATTATTACTAGGATCGTGCATGTCATTTTTCGCTGG
PA genotype 1 TACATTGATCTGTTCTGCAAAATCATTATTACTAGGATCGTGCATGTCATTTTTCGCTGG
*****

PA genotype 2 TATGTTAGTCGGTAGAACGGCAGACGTA AAAACACCATTATGGGATACTGTATGTTTGT
Rispens      TATGTTAGTCGGTAGAACGGCAGACGTA AAAACACCATTATGGGATACTGTATGTTTGT
PA genotype 1 TATGTTAGTCGGTAGAACGGCAGACGTA AAAACACCATTATGGGATACTGTATGTTTGT
*****

PA genotype 2 AATGGCTTTCTGTGCAGGCATTGTCGTTGGGGGAGTGGATTCTG
Rispens      AATGGCTTTCTGTGCAGGCATTGTCGTTGGGGGAGTGGATTCTG
PA genotype 1 AATGGCTTTCTGTGCAGGCATTGTCGTTGGGGGAGTGGATTCTG
*****

```

Nucleotides in blue indicate the single SNP site discriminating the two PA genotypes. The other gap among asterisks indicates the SNP differentiating between wild type virus and attenuated vaccine strains (Rispens and strain 814). Accession numbers: PA1, MK084995; PA2, MK084996.

#### MARKER NO. 7: region of UL36

```

PA genotype 1 ACCGCCACTACCGTTACATCAGTCGTATCTATCACCATCTTTGCCCATTCATCTAGAATT
PA genotype 2 ACCGCCACTACCGTTACATCAGTCGTATCTATCACCATCTTTGCCCATTCATCTAGAATT
*****

PA genotype 1 ACCTCAGGGTTATCCATAATTTGCCAAAATATGGGTCGTGTTTTTCGATCAAGCGAACAG
PA genotype 2 ACCTCAGGGTTATCCATAATTTGCCAAAATATGGGTCGTGTTTTTCGATCAAGCGAACAG
*****

PA genotype 1 AGTCCAGACGTCGATCTATCTCTTAACACGTTTCGAGCTAGCATGGGTGCGTTCGATGTA
PA genotype 2 AGTCCAGACGTCGATCTATCTCTTAACACGTTTCGAGCTAGCATGGGTGCGTTCGATGTA
*****

```

PA genotype 1 GTTCTTGAATATTTCTGCAATTTGTAGTAGCTTGTCTGCTGTCAGTAGAATCTGTCATT  
PA genotype 2 GTTCTTGAATATTTCTGCAATTTGTAGTAGCTTGTCTGCTGTCAGTAGAATCTGTCATT  
\*\*\*\*\*

PA genotype 1 TTACACTCAATTTATATGATTGAAAATATGCGTCGAAACGACATAAGCTCCACTGCTGCC  
PA genotype 2 TTACACTCAATTTATATGATTGAAAATATGCGTCGAAACGACATAAGCTCCACTGCTGCC  
\*\*\*\*\*T\*\*\*\*\*

PA genotype 1 ATAAAGTATTTATACAAGTCATATACTGGGCTGAAGTTAAATTCGGATATTTGACGAGGC  
PA genotype 2 ATAAAGTATTTATACAAGTCATATACTGGGCTGAAGTTAAATTCGGATATTTGACGAGGC  
\*\*\*\*\*

PA genotype 1 GC  
PA genotype 2 GC  
\*\*

Nucleotides in blue indicate the single SNP site discriminating the two PA genotypes. The red nucleotide indicates an additional previously recorded SNP site among the ten strains with fully sequenced genomes. Rispens vaccine sequence is identical to PA genotype no. 2. Accession numbers: PA1, MK084997; PA2, MK084998.

#### MARKER NO. 8: region of UL43

PA genotype 1 TGGTACTCGGGCCAAC TTTATTTTCCGCATGTGCAGCAGCTTTGTTCATGTTATACCTGCA  
PA genotype 2 TGGTACTCGGGCCAAC TTTATTTTCCGCATGTGCAGCAGCTTTGTTCATGTTATACCTGCA  
\*\*\*\*\*G\*\*\*\*\*T\*\*\*\*\*

PA genotype 1 TTAATATAAGGAATGCAAATAAGGGAATTAACAATTAGCAGCTGCCTATATAGTGAAT  
PA genotype 2 TTAATATAAGGAATGCAAATAAGGGAATTAACAATTAGCAGCTGCCTATAGTGAAT  
\*\*\*\*\*

PA genotype 1 CTATACTGGGATTTATCATAACTAGTTACTTGTGTTGTATATTAGTAGCGCTATCTTGAC  
PA genotype 2 CTATACTGGGATTTATCATAACTAGTTACTTGTGTTGTATATTAGTAGCGCTATCTTGAC  
\*\*\*\*\*T

PA genotype 1 -CAAATCGTTGTTACATCTTGGCCATATACGTATTGATCGTTGTTTCGAACCGCGAATA  
PA genotype 2 -CAAATCGTTGTTACATCTTGGCCATATACGTATTGATCGTTGTTTCGAACCGCGAATA  
C\*\*\*\*\*T\*\*\*\*\*

PA genotype 1 AAAC TTT CATA CATACTAAACGATGGAGTTGTGTTTTATGAGCGTTGAAAACAAAGGTAC  
PA genotype 2 AAAC TTT CATA CATACTAAACGATGGAGTTGTGTTTTATGAGCGTTGAAAACAAAGGTAC  
\*\*\*\*\*

PA genotype 1 CATCGG  
PA genotype 2 CATCGG  
\*\*\*\*\*

Nucleotides in blue indicate the single SNP site discriminating the two PA genotypes. The red nucleotides indicate additional previously recorded SNP sites among the ten strains with fully sequenced genomes. Rispens vaccine sequence is identical to PA genotype no. 2. Accession numbers: PA1, MK084999; PA2, MK085000.

### Accession numbers for the MDV-1 isolates utilized in Figure 6.

|                  |            |
|------------------|------------|
| 648A             | AY362725   |
| LMS              | HQ858622   |
| GA               | M89471     |
| RB-1B            | AY243332   |
| CU-2             | AY362708   |
| GX0101           | JX844666.1 |
| MD5              | AF243438   |
| MD11             | AF493558.1 |
| 814              | AF493551.1 |
| CV1988 (Rispens) | AF493555.1 |
| 686              | AY362727   |
| AF               | AF49380    |
| AY               | AY571784   |
| Hmtib            | ABA54944   |
| BC               | AY362707   |
| 584A             | EU62706.5  |
| X                | AY362724   |
| W                | AY362723   |
| U                | AY362722   |
| TK               | AY362721   |
| RL               | AY362720   |
| NEW              | AY362719   |
| N                | AY362718   |
| L                | AY362717   |
| 567              | AY362709   |
| 571              | AY362710   |
| 573              | AY362711   |
| 617A             | AY362712   |
| 637              | AY362713   |
| 549              | AY362714   |
| 595              | AY362715   |
| 643P             | AY362716   |
| JM               | DQ534539   |
| YA               | HQ638156   |
| WS03             | HQ638152   |
| MS57             | EF523771   |
| 0095             | AF493552.1 |

|           |            |
|-----------|------------|
| G2        | AF493556.1 |
| ATE       | AY571784   |
| C12_130   | FJ436096.1 |
| TN-N2     | MH749325.1 |
| 3004      | EU032468   |
| 4CRE      | EF523772   |
| 02LAR     | EF523773   |
| FT158     | EF523774   |
| WOODLANDS | EF523775   |
| MPF57     | EF523771   |
| BY        | HM991861   |
| GX060167  | EU697887   |
| GX070060  | EU427303.1 |
| GX070079  | EU427304.1 |
| TN-N1     | HM749324.1 |
| TN-N3     | HM749326.1 |
| J-1       | HQ190957   |
| YLO40920  | DQ174459   |
| LMEQ      | DQ453117   |
| 0093CH    | AF493550.1 |
| 0297CH    | AF493553.1 |
| 0304CH    | AF493554.1 |
| LLY       | HQ658621.1 |
| LYC       | HQ658627.1 |
| LZY       | HQ658609.1 |
| LFY       | HQ658615.1 |
| LSY       | HQ658626.1 |
| LCGZ      | HQ658612.1 |
| LCD       | HQ658611.1 |
| LCZ       | HQ658613.1 |
| LHUAY     | HQ658620.1 |
| LQQHR     | HQ658624.1 |
| LSY2      | HQ658625.1 |
| LDH       | HQ658614.1 |
| LHC2      | HQ658616.1 |
| LHC3      | HQ658617.1 |
| LNMG      | HQ658623.1 |
| LHC4      | HQ658618.1 |
| LHC5      | HQ658619.1 |
| LCC       | HQ658610.1 |
| TOK_W2    | AB638846   |
| TOK_S1    | AB638844   |
| TOK_P1    | AB638843   |
| TOK_M2    | AB638842   |
| TOK_M1    | AB638841   |
